# Supplementary material for: Potential Therapeutic Effects of Thiazolidinedione on Malignant Glioma
Source: MDPI journal article supplement (doi:10.3390/ijms232113510), 2022-11-04
Supplement: s1 [file s1]

Supplementary Data

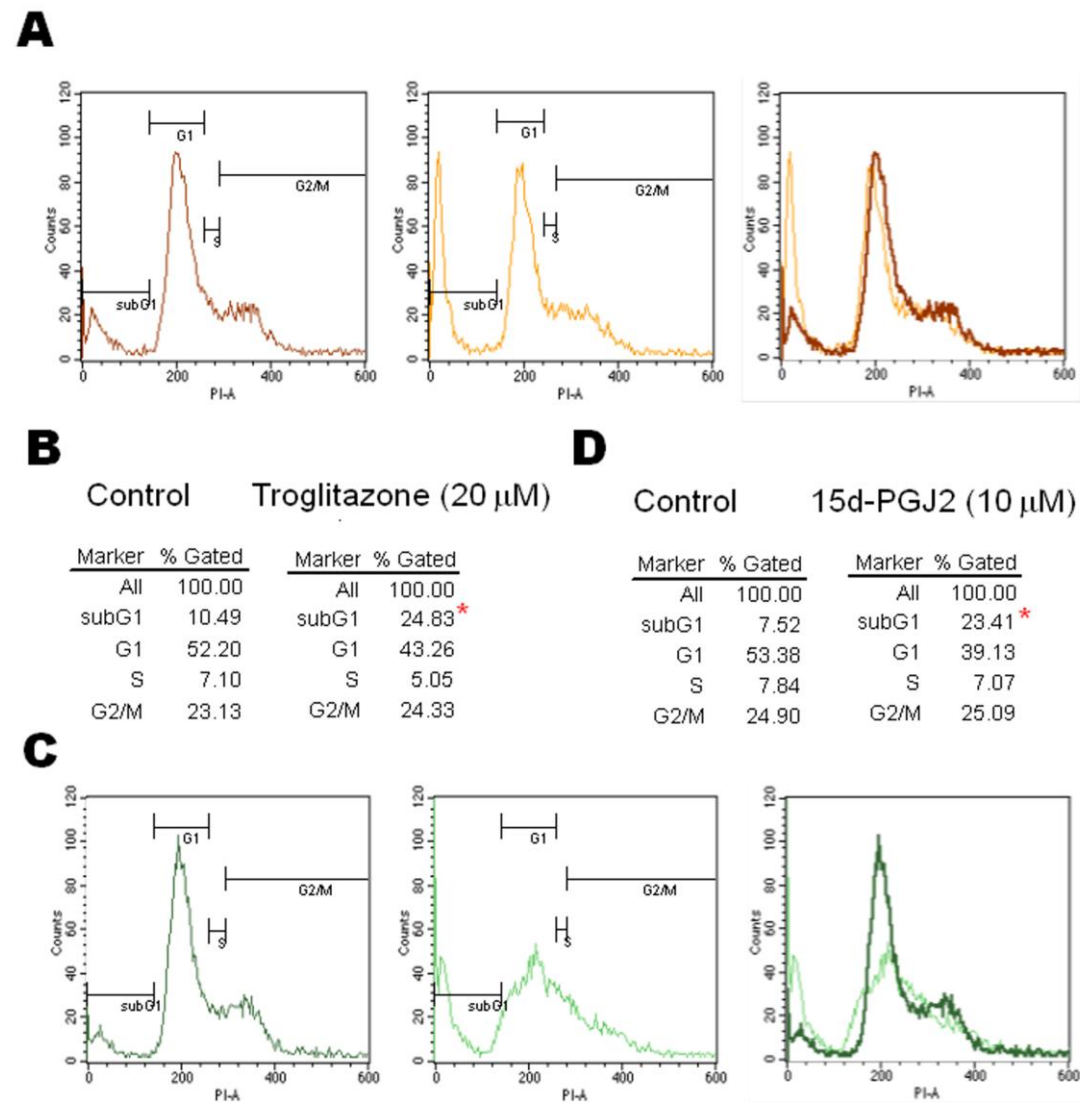

**Supplementary Figure S1:** Detection of U87 cells death treated with thiazolidinedione analogs (Troglitazone and 15d-PGJ2) by Flow Cytometry (A) Cell cycle histogram showing phase distribution (subG0, G1, S and G2/M) of cells at 24 hours post Troglitazone -induction in U87 cells. Quantification for % gated population. (B) Left panel for control, and Right panel for Troglitazone treatment. (C) Cell cycle histogram showing phase distribution (subG0, G1, S and G2/M) of cells at 24 hours post 15d-PGJ2-induction in U87 cells. Quantification for % gated population. (D) Left panel for control, and Right panel for 15d-PGJ2 treatment. Data are expressed as mean  $\pm$  SD (n = 4) \*p < 0.05 vs. control group cells.

**Supplementary Table S1: Primary and secondary antibodies for western blot**

| Antibody                   | Catalog No. | Dilution | Brand                                | Headquarter                 |
|----------------------------|-------------|----------|--------------------------------------|-----------------------------|
| $\alpha$ -tublin           | sc-8035     | 1:500    | Santa Cruz                           | Burlington, MA, USA         |
| Calpain I                  | sc-7531     | 1:500    | Santa Cruz                           | Burlington, MA, USA         |
| Calpain II                 | sc-7533     | 1:1000   | Santa Cruz                           | Burlington, MA, USA         |
| CDK2                       | sc-163      | 1:1000   | Santa Cruz                           | Burlington, MA, USA         |
| CDK4                       | sc-601      | 1:1000   | Santa Cruz                           | Burlington, MA, USA         |
| Cyclin D1                  | sc-717      | 1:500,   | Santa Cruz                           | Burlington, MA, USA         |
| Cyclin E                   | sc-481      | 1:1000   | Santa Cruz                           | Burlington, MA, USA         |
| LAMP 1                     | ab25630     | 1:500    | Abcam                                | Cambridge, United Kingdom   |
| p-STAT3(Tyr705)            | #9131       | 1:500    | Cell Signaling                       | Danvers, Massachusetts ,USA |
| SHP-1                      | sc-7533     | 1:500    | Santa Cruz                           | Burlington, MA, USA         |
| SHP-2                      | sc-7533     | 1:500    | Santa Cruz                           | Burlington, MA, USA         |
| Ubiquitin                  | sc-7533     | 1:1000   | Santa Cruz                           | Burlington, MA, USA         |
| LC3B I/II                  | ab51520     | 1:1000   | Abcam                                | Cambridge, UK.              |
| Goat anti-mouse HRP        | sc-2005     | 1:200    | Santa Cruz                           | Burlington, MA, USA         |
| Goat anti-rabbit HRP       | sc-2004     | 1:200    | Santa Cruz                           | Burlington, MA, USA         |
| Goat anti-rabbit Rhodamine | 03-15-06    | 1:200    | Kirkegaard & Perry Laboratories, Inc | Gaithersburg, Maryland, USA |
| Goat anti-mouse FITC       | 172-1806    | 1:200    | Kirkegaard & Perry Laboratories, Inc | Gaithersburg, Maryland, USA |
| Goat anti-rabbit FITC      | 02-15-16    | 1:200    | Kirkegaard & Perry Laboratories, Inc | Gaithersburg, Maryland, USA |
| Donkey anti-goat HRP       | sc-2020     | 1:200    | Santa Cruz                           | Burlington, MA, USA         |
